# Supplementary material for: The effect of drought on dissolved organic carbon (DOC) release from peatland soil and vegetation sources
Source: Copernicus journal article supplement (doi:10.5194/bg-2016-517), 2017-01-12
Supplement: Supplementary file 1 [file Ritson drought manuscript data.xlsx]

## Sheet: Conditions
	Simulation conditions
		Monthly rainfall (mm)	equivalent ml
	Control	79	32.6
	Mild	51.5	21.2
	Medium	34.7	14.3
	Severe	23.3	9.6
		Temp Min	10.7	celcius
		Temp Max	18.9	celcius
		Rainfall events per month	11
		Simulation length	6	weeks

## Sheet: Results
		DOC extracted	SUVA	Peak C	Peak T	Peak C/T	coagulation removal	SUVA removal
Source	Treatment	mg/g	mg/l/m				%	%
Peat	Control		3.19	0.25	0.09	2.91	43.03	88.55
Peat	Control	0.42	3.98	0.24	0.1	2.35	44.11	73.98
Peat	Control	0.46	2.57	0.19	0.1	1.97	37.62	77.39
Peat	Control	0.59	2.32	0.19	0.07	2.79	51.73	70.41
Peat	Control	0.45	2.63	0.21	0.12	1.76	36.55	76.57
Peat	Mild	0.67	2.35	0.2	0.12	1.72	10.17	81.05
Peat	Mild	0.72	2.57	0.22	0.14	1.52	61	90.67
Peat	Mild	0.68	2.78	0.23	0.11	2.1	25.84	65.53
Peat	Mild	0.66	3.16	0.3	0.09	3.3	45	83.6
Peat	Mild	0.62	4.09	0.25	0.09	2.81	41.85	73.83
Peat	Moderate	0.67	3.1	0.31	0.1	3.26	41.96	81.72
Peat	Moderate	0.64	3.78	0.17	0.09	1.83	19.11	72.63
Peat	Moderate	0.65	3.29	0.31	0.11	2.82	42.48	84.08
Peat	Moderate	0.64	3.98	0.21	0.07	2.95	19.01	67.91
Peat	Moderate	0.46	2.38	0.23	0.11	2.11	26.75	62.38
Peat	Severe	0.67	4.19	0.22	0.08	2.72	57.18	83.13
Peat	Severe	0.45	3.09	0.19	0.08	2.34	42.45	78.76
Peat	Severe	0.6	2.64	0.16	0.09	1.82	40.54	76.91
Peat	Severe	0.49	2.17	0.19	0.1	1.91	27.37	61.53
Peat	Severe	0.68	2.06	0.18	0.23	0.79	25.87	80.51
Sphagnum	Control	2.48	1.54	0.19	0.28	0.69	15.24	60.72
Sphagnum	Control	3.68	1	0.14	0.27	0.52	13.87	86.72
Sphagnum	Control	4.25	0.83	0.16	0.23	0.71	10	70.09
Sphagnum	Control	4.31	0.74	0.13	0.13	1.01	16.4	67.58
Sphagnum	Control	1.96	1.25	0.2	0.31	0.66	8.47	76.51
Sphagnum	Mild	4.89	2.19	0.22	0.16	1.32	19.24	81.66
Sphagnum	Mild	2.37	0.7	0.21	0.23	0.9	34.59	72.36
Sphagnum	Mild	2.04	0.95	0.21	0.25	0.83	40.81	59.96
Sphagnum	Mild	2.3	0.96	0.22	0.28	0.78	36.82	67.02
Sphagnum	Mild	3.66	0.83	0.16	0.21	0.76	31.93	60.47
Sphagnum	Moderate	2.15	0.65	0.25	0.31	0.81	48.92	69.18
Sphagnum	Moderate	4.82	2.24	0.16	0.3	0.53	13.71	90.95
Sphagnum	Moderate	4.36	2.29	0.19	0.28	0.68	29.64	98.45
Sphagnum	Moderate	4.86	2.24	0.22	0.37	0.59	21.62	97.17
Sphagnum	Moderate	5.97	1.59	0.22	0.28	0.78	10.93	85.69
Sphagnum	Severe	2.22	1.71	0.21	0.26	0.8	46.89	75.29
Sphagnum	Severe	1.78	1.74	0.22	0.21	1.04	41.5	77.87
Sphagnum	Severe	5.42	0.69	0.21	0.22	0.95	22.14	81.65
Sphagnum	Severe	2.09	1.64	0.21	0.34	0.61	20.34	77.12
Sphagnum	Severe	3.73	1.19	0.21	0.34	0.61	36.57	70.04
Juncus	Control	6.47	1.78	0.65	0.55	1.19	61.53	30.69
Juncus	Control	6.02	2.11	0.73	0.49	1.5	65.77	37.37
Juncus	Control	4.58	2.22	0.63	0.49	1.29	62.16	61.53
Juncus	Control	6.28	2.17	0.73	0.51	1.44	60.18	59.46
Juncus	Control	9.85	1.83	1.09	0.68	1.6	52.9	39.52
Juncus	Mild	10.85	1.57	0.61	0.51	1.18	61.21	15.42
Juncus	Mild	11.9	1.58	0.64	0.37	1.7	41.88	33.08
Juncus	Mild	8.09	1.99	0.62	0.28	2.19	61.19	35.67
Juncus	Mild	5.52	2.61	0.55	0.24	2.27	43.38	63.07
Juncus	Mild	8.57	1.99	0.59	0.33	1.8	62.9	56.35
Juncus	Moderate	12.46	2.01	0.96	0.66	1.46	35.66	53.83
Juncus	Moderate	11.57	2.09	0.9	0.53	1.69	61.05	26.19
Juncus	Moderate	12.21	2.02	1.07	0.7	1.54	55.83	50.62
Juncus	Moderate	9.22	2.04	0.86	0.55	1.56	43.78	51.76
Juncus	Moderate	8.66	2.28	0.85	0.53	1.61	61.5	51.07
Juncus	Severe	7.43	2.26	0.46	0.25	1.82	35.72	58.99
Juncus	Severe	14.37	1.76	0.59	0.42	1.4	40.86	54.06
Juncus	Severe	11.73	2.02	0.57	0.37	1.56	62.14	38.31
Juncus	Severe	7.04	2.46	0.5	0.27	1.88	58.51	46.51
Juncus	Severe	11.49	1.96	0.66	0.34	1.96	65.88	35.7
Calluna	Control	6.48	1.22	0.21	0.15	1.43	36.8	22.95
Calluna	Control	5.43	2.09	0.24	0.2	1.2	36.1	80.57
Calluna	Control	5.46	1.24	0.15	0.11	1.37	27.5	30.54
Calluna	Control	5.32	1.57	0.21	0.17	1.25	34.89	63.94
Calluna	Control	6.51	1.16	0.24	0.13	1.91	24.58	15.72
Calluna	Mild	8.84	1.54	0.22	0.17	1.27	46.57	20.83
Calluna	Mild	5.31	2.59	0.29	0.21	1.43	34.28	46.86
Calluna	Mild	8.05	2.42	0.32	0.35	0.9	40.42	76.04
Calluna	Mild	5.08	2.49	0.26	0.21	1.25	38.23	82.79
Calluna	Mild	6.25	1.13	0.17	0.12	1.37	28.23	42.4
Calluna	Moderate	8.33	1.72	0.19	0.14	1.34	37.53	66.75
Calluna	Moderate	9.05	1.25	0.21	0.16	1.29	33.18	12.69
Calluna	Moderate	9.62	0.87	0.2	0.15	1.39	31.53	23.89
Calluna	Moderate	5.45	2.56	0.28	0.22	1.25	18.27	82.52
Calluna	Moderate	6.5	2.1	0.2	0.2	0.98	34.65	70.86
Calluna	Severe	6.09	2.08	0.26	0.16	1.6	40.24	65.64
Calluna	Severe	8.51	0.74	0.19	0.12	1.62	20.66	45.67
Calluna	Severe	3.97	2.16	0.19	0.15	1.25	51.56	34.92
Calluna	Severe	8.4	0.98	0.27	0.14	1.88	52.99	40.51
Calluna	Severe	8.56	1.19	0.26	0.15	1.78	32.78	65.12
Molinia	Control	10.87	3.09	0.53	0.39	1.36	41.38	76.76
Molinia	Control	16.78	2.83	0.54	0.37	1.49	47.13	42.55
Molinia	Control	14.1	2.03	0.45	0.35	1.29	46.28	39.22
Molinia	Control	19.04	1.66	0.53	0.38	1.38	31.53	70.14
Molinia	Control	23.89	1.16	0.42	0.29	1.48	44.24	63.96
Molinia	Mild	28.68	1.23	0.52	0.31	1.64	29.72	32.53
Molinia	Mild	9.01	1.82	0.61	0.44	1.38	48.64	87.85
Molinia	Mild	20.27	1.67	0.49	0.34	1.43	50.28	45.8
Molinia	Mild	17.09	1.76	0.48	0.31	1.53	40.99	70.97
Molinia	Mild	24.28	1.57	0.57	0.36	1.56	13.2	64.07
Molinia	Moderate	12.8	3.48	0.35	0.24	1.48	44.86	86.5
Molinia	Moderate	17.3	2.89	0.33	0.23	1.44	41.63	66.98
Molinia	Moderate	16.29	2.97	0.37	0.26	1.43	42.17	34.43
Molinia	Moderate	13.21	3.64	0.33	0.17	1.97	19.97	90.06
Molinia	Moderate	11.24	7.49	0.52	0.36	1.45	36.28	92.35
Molinia	Severe	19.76	3.63	0.4	0.25	1.6	19.47	87.5
Molinia	Severe	11.77	3.6	0.42	0.47	0.9	49.83	80.48
Molinia	Severe	12.41	6.99	0.47	0.25	1.89	19.58	93.8
Molinia	Severe	20.02	2.68	0.42	0.22	1.94	36.16	44.9
Molinia	Severe	11.68	4.46	0.43	0.23	1.86	45.66	82.61
